# Supplementary material for: Interviews with experts in rare diseases for the development of clinical decision support system software - a qualitative study
Source: PubMed Central journal article supplement (PMC7493382; doi:10.1186/s12911-020-01254-3), 2020-09-16
Supplement: 12911_2020_1254_MOESM2_ESM.pdf [file 12911_2020_1254_MOESM2_ESM.pdf]

## Interview guide for the qualitative study

| Leading question                                                                                              | Control questions                                                                                                                                                                                                                                                                                                                        | Questions on maintaining the flow of conversation                                                                                            | Notes |
|---------------------------------------------------------------------------------------------------------------|------------------------------------------------------------------------------------------------------------------------------------------------------------------------------------------------------------------------------------------------------------------------------------------------------------------------------------------|----------------------------------------------------------------------------------------------------------------------------------------------|-------|
| <b>What is the typical diagnostic procedure in the center?</b>                                                | <ul style="list-style-type: none"> <li>• Which steps are performed before patient consultation at the center?</li> <li>• What steps are performed after a patient consultation at the center?</li> <li>• Which persons are in contact with the patient in the diagnosis process?</li> <li>• What happens after the diagnosis?</li> </ul> | I'd like still to know if ...?                                                                                                               |       |
| <b>When do you use software to support diagnosis?</b>                                                         | Use of software tools for diagnosis support                                                                                                                                                                                                                                                                                              | Can you explain this with a concrete situation?                                                                                              |       |
| <b>Who in your center could use a diagnosis support system?</b>                                               | Users of a diagnosis support system                                                                                                                                                                                                                                                                                                      | Can you explain why other users are out of question?                                                                                         |       |
| <b>Which clinical characteristics are important for the diagnosis of rare diseases in your experience?</b>    | Characteristics of Rare Diseases                                                                                                                                                                                                                                                                                                         | Can you describe this in more detail?<br><br>For instance ...?<br><br>Can you explain this in more detail with an example of a patient case? |       |
| <b>Which clinical characteristics are important for diagnosis of rare diseases in your specialized field?</b> | Characteristics of certain groups of Rare Diseases<br><br>Which clinical characteristics do certain groups have in common?                                                                                                                                                                                                               | Can you explain this in more detail using an example disease?                                                                                |       |
| <b>Which clinical findings are important for the diagnosis?</b>                                               | Use of clinical findings: Which clinical findings are particularly relevant? Which are unnecessary?                                                                                                                                                                                                                                      | Can you give some examples?                                                                                                                  |       |

|                                                                                                                                   |                                                                                              |                                                                         |  |
|-----------------------------------------------------------------------------------------------------------------------------------|----------------------------------------------------------------------------------------------|-------------------------------------------------------------------------|--|
| <b>What information do you document about a patient case?</b>                                                                     | Documentation of information on a patient (e.g. suspicious diagnoses or letter of physician) | Can you describe this in more detail?<br><br>What do you mean, exactly? |  |
| <b>When do you document findings about patient cases?</b>                                                                         | Time of documentation (e.g. during or after the presentation in the center)                  |                                                                         |  |
| <b>We are now at the end of the interview. Is there anything else we haven't talked about yet that is relevant for the topic?</b> | Thanks to the interview partner<br><br>Outlook of the project                                |                                                                         |  |
