# Supplementary material for: Interviews with experts in rare diseases for the development of clinical decision support system software - a qualitative study
Source: Springer Nature journal article supplement (doi:10.1186/s12911-020-01254-3), 2020-09-16
Supplement: MOESM3 [file 12911_2020_1254_MOESM3_ESM.pdf]

## Part A - Initial version of the category system

| <b>Main category</b>                                     | <b>Sub category</b>                                       |
|----------------------------------------------------------|-----------------------------------------------------------|
| Category 1: Diagnostic process                           | Category 1.1: Steps before a consultation with a patient  |
|                                                          | Category 1.2: Steps after a consultation with a patient   |
|                                                          | Category 1.3: Persons involved in the diagnostic process  |
|                                                          | Category 1.4: Steps after the completion of the diagnosis |
| Category 2: Use of software tools for diagnostic support | Category 2.1: Users of a clinical decision support system |
| Category 3: Clinical characteristics of RDs              | Category 3.1: Characteristics of groups of RDs            |
| Category 4: Clinical findings                            | Category 4.1: Usage of findings                           |
|                                                          | Category 4.2: Relevance of findings                       |
| Category 5: Patient documentation                        | Category 5.1: Time of documentation                       |

## Part B - Final version of the category system

The category 1.2 "Steps after a consultation with a patient" was removed. The category 3 "Clinical characteristics of RD" and category 4 "Clinical Findings" were merged, because of overlapping meaning. For the same reason, category 5 "Patient documentation" and sub-category 5.1 "Time of documentation" were collapsed as new category 4 "Patient documentation".

| <b>Main category</b>                                     | <b>Sub category</b>                                       |
|----------------------------------------------------------|-----------------------------------------------------------|
| Category 1: Diagnostic process                           | Category 1.1: Steps before a consultation with a patient  |
|                                                          | Category 1.2: Persons involved in the diagnostic process  |
| Category 2: Use of software tools for diagnostic support | Category 2.1: Users of a clinical decision support system |
| Category 3: Clinical characteristics and findings of RDs | Category 3.1: Usage of clinical findings                  |
|                                                          | Category 3.2: Relevance of clinical findings              |
| Category 4: Patient documentation                        |                                                           |

## Part C – Description of the coding tree

| Category                                                  | Description                                                                                                  |
|-----------------------------------------------------------|--------------------------------------------------------------------------------------------------------------|
| Category 1: Diagnostic process                            | Description of the diagnostic process from the first contact of a patient up to the diagnosis and treatment. |
| Category 1.1: Steps before a consultation with a patient  | Which steps are performed before a patient is admitted at a center?                                          |
| Category 1.2: Persons involved in the diagnostic process  | Who gets in contact with a patient in the diagnostic process?                                                |
| Category 2: Use of software tools for diagnostic support  | Usage of software tools for diagnostic support in the centers.                                               |
| Category 2.1: Users of a clinical decision support system | Who could use the CDSS in the diagnostic process?                                                            |
| Category 3: Clinical characteristics and findings of RDs  | Which clinical characteristics and findings do rare diseases patients have in common?                        |
| Category 3.1: Usage of clinical findings                  | Who reads and uses the clinical findings?                                                                    |
| Category 3.2: Relevance of clinical findings              | Which clinical findings are particularly relevant for the diagnosis of rare diseases?                        |
| Category 4: Patient documentation                         | Documentation of information on rare disease patients.                                                       |
